# Supplementary material
Source: PubMed Central journal article supplement (PMC7225668)
Supplement: djz152_supplementary_data.pdf [file djz152_supplementary_data.pdf]

## SUPPLEMENTARY TABLES

**Supplementary Table 1. Relative risk of diabetes adjusted for: (1) race/ethnicity, sex, and attained age and (2) race/ethnicity, sex, attained age and body mass index (BMI) for the whole cohort and for individual diagnostic groups**

| Characteristic   | Not adjusted for BMI |        | Adjusted for BMI   |        |
|------------------|----------------------|--------|--------------------|--------|
|                  | RR* (95% CI)         | P†     | RR* (95% CI)       | P†     |
| All patients     |                      |        |                    |        |
| Sibling          | Reference            | —      | Reference          | —      |
| Abdominal RT     | 2.79 (1.91, 4.07)    | < .001 | 3.23 (2.20, 4.74)  | < .001 |
| No abdominal RT  | 1.71 (1.20, 2.45)    | .003   | 1.75 (1.22, 2.52)  | .003   |
| Hodgkin Lymphoma |                      |        |                    |        |
| Sibling          | Reference            | —      | Reference          | —      |
| Abdominal RT     | 1.99 (1.23, 3.22)    | .005   | 2.65 (1.63, 4.31)  | < .001 |
| No abdominal RT  | 1.28 (0.71, 2.32)    | .42    | 1.41 (0.78, 2.56)  | .26    |
| Neuroblastoma    |                      |        |                    |        |
| Sibling          | Reference            | —      | Reference          | —      |
| Abdominal RT     | 8.64 (4.30, 17.37)   | < .001 | 9.02 (4.51, 18.05) | < .001 |
| No abdominal RT  | 1.49 (0.64, 3.49)    | .36    | 1.53 (0.66, 3.53)  | .32    |
| Wilms            |                      |        |                    |        |
| Sibling          | Reference            | —      | Reference          | —      |
| Abdominal RT     | 3.74 (2.01, 6.97)    | < .001 | 4.00 (2.12, 7.55)  | < .001 |
| No abdominal RT  | 0.72 (0.21, 2.50)    | .60    | 0.77 (0.22, 2.68)  | .68    |
| CNS tumors       |                      |        |                    |        |
| Sibling          | Reference            | —      | Reference          | —      |
| Abdominal RT     | 3.60 (1.85, 7.02)    | < .001 | 3.48 (1.73, 7.01)  | < .001 |
| No abdominal RT  | 1.23 (0.70, 2.17)    | .47    | 1.26 (0.71, 2.23)  | .43    |
| Other            |                      |        |                    |        |
| Sibling          | Reference            | —      | Reference          | —      |
| Abdominal RT     | 2.49 (1.41, 4.39)    | .002   | 2.81 (1.60, 4.96)  | < .001 |
| No abdominal RT  | 1.99 (1.37, 2.90)    | < .001 | 2.00 (1.37, 2.93)  | < .001 |

\*All relative risks are adjusted for attained age (continuous), race (white, non-Hispanic vs all others), and gender. BMI=body mass index; RR=relative risk; 95% CI=95% Confidence interval; RT=radiotherapy

† Relative risks and 95% CI were estimated using a generalized estimation equation model with a log-link function, and *P* values were obtained using a two-sided Wald test

**Supplementary Table 2. Demographic and treatment-related risk factors associated with diabetes risk in survivors of childhood cancer exposed and unexposed to abdominal radiation\***

| Variable                   | Survivors exposed to abdominal RT |        | Survivors not exposed to abdominal RT |        |
|----------------------------|-----------------------------------|--------|---------------------------------------|--------|
|                            | Relative risk (95% CI)†           | P†     | Relative risk (95% CI)†               | P†     |
| Age at diagnosis*          | 0.56 (0.36, 0.87)                 | .009   | 0.85 (0.61, 1.19)                     | .35    |
| Sex                        |                                   | .84    |                                       | .94    |
| Female                     | Reference                         |        | Reference                             |        |
| Male                       | 1.04 (0.70, 1.55)                 |        | 1.01 (0.75, 1.36)                     |        |
| Race                       |                                   | .25    |                                       | .01    |
| White, non-Hispanic        | Reference                         |        | Reference                             |        |
| Black, non-Hispanic        | 1.95 (0.78, 4.85)                 |        | 2.28 (1.31, 3.97)                     |        |
| Hispanic                   | 2.27 (0.79, 6.55)                 |        | 1.71 (0.66, 4.40)                     |        |
| Other                      | 1.19 (0.58, 2.45)                 |        | 1.56 (0.92, 2.66)                     |        |
| BMI group                  |                                   | < .001 |                                       | < .001 |
| < 18.5                     | 0.54 (0.17, 1.72)                 |        | 1.07 (0.50, 2.30)                     |        |
| 18.5 – 24.9                | Reference                         |        | Reference                             |        |
| 25 – 29.9                  | 1.57 (0.99, 2.47)                 |        | 1.72 (1.19, 2.49)                     |        |
| ≥30                        | 4.43 (2.83, 6.95)                 |        | 4.35 (3.12, 6.06)                     |        |
| Cranial radiation          |                                   | .78    |                                       | .46    |
| No                         | Reference                         |        | Reference                             |        |
| Yes                        | 0.93 (0.58, 1.50)                 |        | 1.13 (0.82, 1.54)                     |        |
| Alkylating agents          |                                   | .20    |                                       | .49    |
| No                         | Reference                         |        | Reference                             |        |
| Yes                        | 1.30 (0.87, 1.94)                 |        | 1.11 (0.82, 1.51)                     |        |
| Corticosteroids            |                                   | .22    |                                       | .03    |
| No                         | Reference                         |        | Reference                             |        |
| Yes                        | 0.76 (0.48, 1.19)                 |        | 1.40 (1.04, 1.88)                     |        |
| Anthracyclines             |                                   | .45    |                                       | --     |
| No                         | Reference                         |        | --                                    |        |
| Yes                        | 0.84 (0.54, 1.32)                 |        | --                                    |        |
| Abdominal RT dose          |                                   | .90    |                                       | --     |
| 0.1 – 9.9                  | Reference                         |        | --                                    |        |
| 10 – 19.9                  | 0.65 (0.17, 2.47)                 |        | --                                    |        |
| 20 – 29.9                  | 0.67 (0.18, 2.42)                 |        | --                                    |        |
| ≥30                        | 0.74 (0.21, 2.62)                 |        | --                                    |        |
| Total pancreas dose (Mean) |                                   | .24    |                                       | --     |
| 0.1 – 9.9                  | Reference                         |        | --                                    |        |
| 10 – 19.9                  | 1.62 (0.67, 3.96)                 |        | --                                    |        |
| 20 – 29.9                  | 2.33 (0.95, 5.73)                 |        | --                                    |        |
| ≥30                        | 2.13 (0.82, 5.58)                 |        | --                                    |        |
| Pancreas tail dose (Mean)  |                                   | .02    |                                       | --     |
| 0.1 – 9.9                  | Reference                         |        | --                                    |        |
| 10 – 19.9                  | 1.15 (0.72, 1.85)                 |        | --                                    |        |
| 20 – 29.9                  | 2.20 (1.18, 4.12)                 |        | --                                    |        |

|                           |                   |     |    |    |
|---------------------------|-------------------|-----|----|----|
| ≥30                       | 2.52 (1.18, 5.38) |     | -- |    |
| Pancreas head dose (Mean) |                   | .50 |    | -- |
| 0.1 – 9.9                 | Reference         |     | -- |    |
| 10 – 19.9                 | 1.30 (0.55, 3.05) |     | -- |    |
| 20 – 29.9                 | 1.64 (0.73, 3.70) |     | -- |    |
| ≥30                       | 1.22 (0.52, 2.85) |     | -- |    |
| Pancreas body dose (Mean) |                   | .46 |    | -- |
| 0.1 – 9.9                 | Reference         |     | -- |    |
| 10 – 19.9                 | 1.46 (0.56, 3.77) |     | -- |    |
| 20 – 29.9                 | 1.95 (0.77, 4.94) |     | -- |    |
| ≥30                       | 1.67 (0.63, 4.44) |     | -- |    |
| V10 (pancreas % ≥10 Gy)   |                   | .36 |    | -- |
| 0                         | Reference         |     | -- |    |
| 0.1 – 74.9                | 1.11 (0.27, 4.55) |     | -- |    |
| ≥75                       | 1.51 (0.37, 6.09) |     | -- |    |
| V20 (pancreas % ≥20 Gy)   |                   | .53 |    | -- |
| 0                         | Reference         |     | -- |    |
| 0.1 – 74.9                | 1.08 (0.62, 1.89) |     | -- |    |
| ≥75                       | 1.35 (0.77, 2.37) |     | -- |    |
| V30 (pancreas % ≥30 Gy)   |                   | .79 |    | -- |
| 0                         | Reference         |     | -- |    |
| 0.1 – 74.9                | 1.18 (0.72, 1.96) |     | -- |    |
| ≥75                       | 1.02 (0.60, 1.72) |     | -- |    |

\* For all analyses, a GEE GLM model was fit adjusting for attained age (continuous) as well as the given predictor of interest. Radiation dose refers to the maximum tumor dose (maxTD) from summing all of the overlapping radiation fields prescribed to the abdomen and the mean dose to the whole pancreas and head, body, and tail of the pancreas. Radiation dose-volume metrics refer to the percent of the whole pancreas that received ≥10 Gy (V10), ≥20Gy (V20), or ≥30 Gy (V30) from radiation. BMI=body mass index; 95% CI=95% confidence interval; RT=radiation therapy. †Relative risks and 95% CI were estimated using a generalized estimation equation model with a log-link function, and *P* values were obtained using a two-sided Wald test

**Supplementary Table 3. Excess Odds Ratio Model**

| Scenarios                                                      | $\beta$ -estimate | 95% CI           | <i>P</i> * |
|----------------------------------------------------------------|-------------------|------------------|------------|
| 1. Model with dose                                             |                   |                  |            |
| Intercept                                                      | -4.35             | -4.65, -4.05     | <.001      |
| Dose (continuous)†                                             | 0.093             | 0.04, 0.15       | <.001      |
| 2. Model with dose plus the quadratic term                     |                   |                  |            |
| Intercept                                                      | -4.64             | -5.1, -4.1       | <.001      |
| Dose (continuous)†                                             | 0.22              | 0.01, 0.43       | .04        |
| Dose x Dose†                                                   | -0.0037           | -0.009,<br>0.001 | .16        |
| 3. Model including dose, age at diagnosis and interaction term |                   |                  |            |
| Intercept                                                      | -6.06             | -7.97, -4.14     | <.001      |
| Dose (continuous)†                                             | 0.78              | -0.91, 2.47      | .36        |
| Age at diagnosis (continuous)                                  | 0.58              | -0.72, 1.88      | .38        |
| Dose x age at diagnosis                                        | -0.038            | -0.13, 0.05      | .42        |

\* *P* values were obtained using a two-sided Wald test. Beta estimate= $\beta$ ; confidence intervals=CI

†Dose=average pancreas tail dose
